1  
2 Visualization and Analysis of Whole Depot Adipose Tissue Innervation  
3  
4  
5  
6

7 Jake W. Willows<sup>1</sup>, Magdalena Blaszkiewicz<sup>1,2</sup>, Amy Lamore<sup>3</sup>, Samuel Borer<sup>1</sup>, Amanda L.  
8 Dubois<sup>3</sup>, Emma Garner<sup>1</sup>, William P. Breeding<sup>4</sup>, Karissa B. Tilbury<sup>2,4</sup>, Andre Khalil<sup>2,4,5</sup>,  
9 Kristy L. Townsend<sup>1,2\*</sup>  
10  
11  
12  
13  
14  
15  
16

17 <sup>1</sup>School of Biology and Ecology, University of Maine, Orono ME

18 <sup>2</sup>Graduate School of Biomedical Science and Engineering, University of Maine, Orono ME

19 <sup>3</sup>School of Molecular and Biomedical Sciences, University of Maine, Orono ME

20 <sup>4</sup>Department of Chemical and Biomedical Engineering, University of Maine, Orono ME

21 <sup>5</sup>CompuMAINE Laboratory, University of Maine, Orono ME  
22  
23  
24  
25  
26  
27  
28  
29  
30  
31  
32  
33

34 \*Corresponding Author – please direct all correspondence and requests for materials to:  
35  
36

37 kristy.townsend@maine.edu; 207-581-2541  
38 5735 Hitchner Hall, Rm 301, Orono ME 04469  
39  
40  
41  
42  
43  
44  
45  
46  
47  
48  
49  
50  
51

52  
53  
54  
55  
56  
57  
58  
59  
60  
61  
62  
63  
64  
65  
66  
67  
68  
69  
70  
71  
72  
73  
74  
75  
76  
77  
78  
79  
80  
81  
82  
83  
84  
85

## **Abstract**

Adipose tissue requires neural innervation in order to regulate important metabolic functions. Though seminal work on adipose denervation has underscored the importance of adipose-nerve interactions in both white (energy storing) and brown (energy expending) adipose tissues, much remains a mystery. This is due, in part, to the inability to effectively visualize the various nerve subtypes residing within these tissues and to gain a comprehensive quantitation of neurite density in an entire depot. With the recent surge of advanced imaging techniques such as light sheet microscopy and optical clearing procedures, adipose tissue imaging has been reinvigorated with a focus on three-dimensional analysis of tissue innervation. However, clearing techniques are time consuming, often require solvents caustic to objective lenses, alter tissue morphology, and greatly reduce fluorophore lifespan. Not only are current methods of imaging wholemount adipose tissues inconvenient, but often attempts to quantify neurite density across physiological or pathophysiological conditions have been limited to representative section sampling. We have developed a new method of adipose tissue neurite imaging and quantitation that is faster than current clearing-based methods, does not require caustic chemicals, and leaves the tissue fully intact. Maintenance of a fully intact depot allowed for tiling z-stacks and producing maximum intensity projections of the entire adipose depot, which were then used to quantify neurite density across the tissue. With this processing method we were able to characterize the nerves, nerve-subtypes, and neurovascular interactions within the inguinal subcutaneous white adipose tissue in mice using up to five fluorescent channels at high resolution. We also utilized second harmonic generation, which provides label-free imaging, to investigate collagen fiber abundance in adipose of obese mice.

86

87

88 **Introduction:**

89 Historically overlooked as a location of diverse peripheral innervation [1], the adipose organ  
90 was most prominently inspected for innervation in the mid 1960's when sympathetic nerve fibers  
91 were visualized within brown adipose tissue (BAT) [2]. BAT nerves were later comprehensively  
92 investigated by T.J. Bartness [3]. Energy expending BAT was the first adipose tissue to be  
93 identified as being highly innervated due to its important role in thermogenesis [4], which  
94 requires significant sympathetic input [2, 5, 6]. Sensory innervation has also been documented  
95 in BAT, particularly around vasculature, and has been proposed to play a role in lipolysis [7].  
96 More recently white adipose tissue (WAT), associated more with energy storage, was  
97 demonstrated to be highly innervated by sympathetic [8, 9] and sensory nerves [5, 10], but not  
98 parasympathetic [11] nerves.

99 In order to visualize adipose innervation, it had been common practice to slice adipose  
100 tissue into 7um-10um thick sections and immunolabel for various neuronal markers [11-14],  
101 such as the sympathetic marker tyrosine hydroxylase (TH), the rate-limiting enzyme for  
102 synthesis of catecholamine neurotransmitters such as norepinephrine. A number of important  
103 findings emerged from this practice, but it was not without limitations. Thin sections of tissue  
104 reduce peripheral nerves to puncta, leaving investigators unable to accurately determine  
105 arborization or the ability to quantify innervation across an intact tissue. Importantly, our  
106 laboratory has revealed a new map of adipose anatomy in the inguinal subcutaneous white  
107 adipose tissue (i-scWAT) depot, and we and others have demonstrated that the pattern of  
108 innervation in scWAT is heterogeneous [15], thus warranting a more comprehensive look at  
109 adipose innervation across an intact depot and changes that may occur with physiological or  
110 pathophysiological stimuli.

111 The limitations of thin-slice immunostaining of adipose nerves did not go unnoticed, which  
112 resulted in the emergence of several methods for imaging and quantifying innervation within  
113 whole adipose depots [15-21]. However, even the new and improved methods also are not  
114 without their flaws. All of the current whole depot imaging methods require optical clearing and  
115 refractive index matching to visualize tissue innervation. Optical clearing typically alters tissue  
116 morphology by either shrinking, expanding, or hardening the tissue, or it greatly limits  
117 fluorophore lifespan to less than three days. Furthermore, some of the most effective methods  
118 of tissue clearing use caustic chemicals that require specialized objective lenses (ie: "BABB-  
119 safe") for microscopy. These issues with clearing techniques have been extensively reviewed in

120 multiple organs [22-24]. The current methods also typically rely on quantifying only a few small  
121 representative three-dimensional tissue sections, which misses the heterogeneity and regional  
122 anatomy of the intact tissue. The regional variation in neurite density in scWAT [15, 19], cannot  
123 be accurately reduced to a few representative images or a small tissue block.

124 To mitigate all of the issues outlined above, we have developed a whole mount imaging  
125 technique that does not require optical clearing or tissue sectioning and can be imaged using  
126 standard confocal microscopy and quantified using code that we have made publicly available.  
127 Our technique maintains an intact adipose depot and allows for detailed visualization of up to  
128 five fluorescent channels at a time at high resolution. This technique has been extensively  
129 tested with direct (conjugated antibodies) and indirect (primary and secondary antibodies)  
130 fluorescent labeling of various neuronal markers, as well as with mouse lines with fluorescent  
131 neuronal reporters. We have optimized our whole mount method for the pan-neuronal markers  
132 PGP9.5 [25, 26] and  $\beta$ 3-tubulin [27, 28]; the sympathetic nerve marker, tyrosine hydroxylase  
133 (TH) [14]; markers for sensory innervation, advillin (AVIL) [29, 30] and  $\text{Na}_v$  1.8 [31]; myelination  
134 marker myelin protein zero (MPZ) [32]; and many others. This technique has also been  
135 optimized for various non-antibody based fluorescent labeling approaches such as nuclear  
136 labeling with DAPI and vascular labeling with Isolectin IB<sub>4</sub> (IB4). This has allowed us to further  
137 our understanding of scWAT in mice by characterizing the innervation that exists within this  
138 tissue with greater scrutiny, demonstrating neurovascular interactions, parenchymal innervation,  
139 and neuroimmune interactions.

140

## 141 **Methods:**

### 142 Cold exposure experiments

143 All cold exposure was carried out in a diurnal incubator (Caron, Marietta, OH, USA) at  
144 5°C. Adult male C67BL/6J mice were housed two to a cage and either maintained at room  
145 temperature or continuously cold exposed for 7 days. Inguinal and/or axillary scWAT was  
146 collected for wholemound tissue processing.

147

### 148 Mouse adipose tissue collection and processing for immunofluorescence

149 Mice were euthanized using CO<sub>2</sub> followed by cervical dislocation. Whole scWAT depots  
150 were carefully removed to remain fully intact and immediately fixed in 2% PFA at 4°C for 4hr-  
151 12hrs depending on thickness of tissue. The tissues were then rinsed for 10 minutes with 1X  
152 PBS w/ 10U/mL heparin, twice at 4°C. Tissues were incubated in blocking buffer (1XPBS/2.5%  
153 BSA/0.5-1% Triton) at 4°C at least overnight but no more than 7 days (depending on tissue

154 thickness) with blocking buffer replaced every 24hrs. After blocking period, tissues were  
155 flattened by being placed between two large glass slides bound tightly together with large binder  
156 clips, for 1.5hrs at 4°C to prevent tissues from drying out. Tissues were next incubated in either  
157 0.1% Typogen Black for 20 minutes at room temperature on a rotator or TrueBlack® Lipofuscin  
158 Autofluorescence Quencher for 10 minutes at room temperature on a rotator. TrueBlack® was  
159 only used when using a 647nm fluorophore. At the end of incubation tissues were washed with  
160 1X PBS w/ 10U/mL heparin on rotating platform at 4°C replacing PBS every 1hr for a total of 4-  
161 6hrs, or until all unbound stain was removed. Tissues were incubated with primary antibody for  
162 48hrs at 4°C the following day tissues were washed with 1XPBS on a rotating platform at 4°C,  
163 replacing PBS every 1hr for a total of 4-6hrs followed by incubation with secondary fluorescent  
164 antibodies overnight. Tissues were then again washed with 1XPBS on a rotating platform at  
165 4°C, replacing PBS every 1hr for a total of 4-6hrs. Following the immunostaining steps, when  
166 applicable, tissues were incubated with 1ug/mL isolectin B<sub>4</sub> (IB4) (ThermoFischer, cat#:I32450  
167 or cat#:I21413) diluted in HEPES buffer (pH 7.4), overnight at room temperature on a rotator.  
168 Tissues were then washed with 1XPBS on a rotating platform at room temperature for one hour  
169 twice. At this time, if DAPI co-staining was required, the tissues were incubated in 100ng/mL  
170 DAPI for 10 minutes at room temperature on a rotator. Tissues then received four 1hr washes in  
171 1xPBS at room temperature. At the conclusion of washing steps tissues were placed on large  
172 glass slides medial side facing up. A few drops of glycerol based mounting media were added to  
173 the tissue and coverslip was placed on top. Glycerol based mounting media is required because  
174 aqueous based mounting fluid lacks the required viscosity to fully adhere the coverslip when  
175 dealing with whole mount adipose. Slides were weighted down for 3-7 days then sealed.

176

#### 177 Whole mount confocal imaging

178 Fully intact scWAT depots were imaged with a 10x objective on a Leica TCS SP8 DLS  
179 (Leica Microsystems, Wetzlar, Germany) microscope by tiling z-stacks across the full depth and  
180 area of the tissue. Whole depot images in this manuscript were scanned bidirectionally at either  
181 400Hz or 600Hz, with line averaging ranging between 3-8, and z-step size ranging between 5-  
182 16 µm. Identical image acquisition settings were applied for all tissues within cohorts that  
183 received neurite density quantifications. Anywhere between 20,000-65,000 individual images  
184 were captured per tissue which ranged from 100-900 tiles. These tiles were then merged  
185 together and processed into a 2D maximum intensity projection image either in LASX (Leica  
186 imaging software) or in Fiji [33] if being used for quantification. Digital nerve bundle cross

187 sectioning was performed by using the XZY scanning mode. During cross-sectioning a 2.54x  
188 digital zoom was automatically applied to each image.

189

### 190 Image processing and neurite density quantification

191 Maximum intensity projections through the z-dimension (z-max projection) were  
192 generated for each tile individually using Fiji [33]. All single tile z-max projections were further  
193 processed using MATLAB x64 software (version 2018b, MathWorks). To remove low-frequency  
194 background noise, a 2D Gaussian smoothing kernel was used to convolve each z-max  
195 projection with a very large Gaussian blur using the *imgaussfilt* MATLAB command, with large  
196 standard deviation (~150), which was then subtracted from its corresponding original z-max  
197 projection. Next, a small gaussian blur (*imgaussfilt* with small standard deviation, ~2-3) was  
198 used on the (post background subtraction) image to broaden out the neurite signal slightly  
199 before thresholding the image. Next, a binary (black and white) thresholded mask was  
200 generated from the processed image. In the mask, only regions having an area larger than 40  
201 pixels were kept for further analysis (using the *bwareaopen* MATLAB command). Then the  
202 *bwskel* MATLAB command was used to perform the skeletonizing procedure, with the added  
203 feature of removing any branches less than 4 pixels long. Total nerve length was calculated  
204 using values measured for each single-tile z-max projection. Total nerve arborization density  
205 was calculated as the ratio of total nerve length divided by the total viewing area, resulting in  
206 nerve length per square meter of tissue. To generate heat maps a csv file was generated with  
207 the topological positions and the associated arborization quantity of each tile using the  
208 HeatMapChart function.

209

### 210 Second harmonic generation imaging

211 All 2-photon microscopy studies used a modified Olympus FV300 system with an upright  
212 BX50WI microscopy stand (Olympus, Center Valley, Pennsylvania) and a mode-locked  
213 Ti:Sapphire laser (Chameleon, Coherent, Santa Clara, California). Laser power was modulated  
214 via an electro-optic modulator (ConOptics, Danbury, Connecticut). The fluorescence and SHG  
215 signals were collected in a non-descanned geometry using a single PMT (H7422 GaAsP,  
216 Hamamatsu, Hamamastu City, Japan). Emission wavelengths were separated from excitation  
217 wavelengths using a 665 nm dichoric beamsplitter followed by 582/64 nm and 448/20 nm  
218 bandpass filters for Alexa 488 and SHG signals respectively (Semrock, Rochester, New York).  
219 Images were acquired using circular polarization with excitation power ranging from 1- 50 mW

220 and a 40x 0.8 NA water immersion objective with 3x optical zoom with scanning speeds of  
221 2.71s/frame. All images were 515 x 512 pixels with a field of view of 85  $\mu$ m.

222

## 223 **Results and Discussion**

### 224 Whole Mount Technique

225 We have tested numerous clearing techniques with scWAT and BAT (Suppl. Fig. S1) which  
226 included ScaleA2 [34], BABB [35, 36], CUBIC [37], CUBIC CB-perfusion [37], iDISCO [38],  
227 uDISCO [39], UbasM [40], and a sucrose gradient method [41]. Each clearing method had its  
228 own set of trade-offs, with some methods distorting tissue morphology, limiting fluorescence  
229 lifespan, and requiring costly objective lenses to image (summarized in Suppl. Table 1). These  
230 pros and cons have been well documented in various other tissues [22-24]. To circumvent these  
231 issues, we developed a method of whole tissue processing, outlined in Fig. 1a, that allowed for  
232 imaging and quantifiable analysis of intact whole adipose depots for up to 5-separate  
233 fluorescent channels (Suppl. Fig. S2) and did not require optical clearing. With the development  
234 of our wholemound technique we have found that, contrary to popular belief, optical clearing of  
235 scWAT is not necessary to image the innervation of entire scWAT depots. Furthermore, our  
236 method is significantly more time efficient and more cost effective than optical clearing. This  
237 approach has allowed us to image entire tissue depots and construct 2D visualizations from 3D  
238 data acquisition (by tiling z-max projection images taken at low magnifications using a laser  
239 scanning confocal microscope (Fig. 1b)). Generating images of entire tissues through tiled z-  
240 max projections requires tens of thousands of images to be captured and can often take  
241 between 10-30hrs to complete. This number is highly variable and dependent on tissue area  
242 and thickness, the desired image quality, sampling granularity, and the number of fluorescent  
243 channels being used. Tiled z-max projections can be processed for quantification of nerve  
244 density (as described in Methods section) (Fig. 1c). Because a two-dimensional image is  
245 rendered from three-dimensional data, the length of the nerve fibers in the z-plane is lost.  
246 However, the data omitted is negligible by comparison and does not affect tissue to tissue  
247 comparisons. The protocols for tissue processing and script for quantifying neurite density have  
248 been made available at protocols.io and GitHub respectively (Fig. 1d).

249 Whole mount processing of inguinal and axillary scWAT was achieved by excising intact  
250 depots from the mouse and fixing in 2% PFA. Tissue z-depth was reduced significantly by  
251 flattening the tissue between 2 large glass slides with binder clips to apply pressure; in a  
252 process we've termed "z-depth reduction." By reducing the tissue thickness in the z-plane we  
253 were able to reduce tissue thickness with minimal tissue deformity or effects on relative tissue

254 anatomy (Fig. 2a). Z-depth reduction provided increased penetration of blocking reagents and  
255 antibodies which significantly reduced incubation times and allowed for the whole tissue to be  
256 mounted on a slide with coverslip.

257 An important benefit of flattening adipose tissue is greater penetration of blocking solutions,  
258 antibodies, and autofluorescence quenching solutions. For most imaging we used 0.1% Sudan  
259 Black B (henceforth referred to by the less racially-problematic term Typogen Black) to  
260 decrease tissue autofluorescence. Typogen Black staining has been used as a treatment to  
261 quench tissue autofluorescence for decades in 7-10  $\mu\text{m}$  thick sections [42]. Tissue  
262 autofluorescence has always been a significant problem when imaging adipose due to the  
263 inherent autofluorescent nature of lipids and lipofuscin that reside within it [43]. We applied  
264 this technique to the entire adipose depot to greatly reduce tissue autofluorescence in  
265 combination with DAPI, GFP, Cy3, and Cy5 excitation/emission filters (Fig. 2b). However,  
266 Typogen Black itself is highly fluorescent under far red excitation (illustrated using Cy5 filter in  
267 figure 2b) which makes it often necessary to quench autofluorescence with TrueBlack instead,  
268 which does not fluoresce as extensively with far red excitation (Fig. 2b-c). Red blood cells are  
269 also highly autofluorescent which made it necessary to implement washing steps that used 1X  
270 PBS with 10U/mL Heparin to help flush out remaining blood from vasculature (Fig. 2d). In other  
271 instances, the autofluorescent red blood cells can be exploited to visualize the larger blood  
272 vessels that are missed by IB4, as we did previously [15].

273 Uniform staining of large whole mount tissues has always been problematic due to the  
274 increased incubation times required for antibodies to completely diffuse throughout the tissue  
275 [44, 45]. Incubation times were reduced 1-2 days by reducing tissue thickness and increasing  
276 surface with z-depth reduction. Depth coding of immunostained scWAT following z-depth  
277 reduction indicated an even penetration of antibodies throughout the whole tissue (Fig. 2e) and  
278 in representative sections (Fig. 2f) for various fluorescent staining approaches including: directly  
279 labeled  $\beta$ 3-tubulin, indirectly labeled TH, and IB4 staining.

280

### 281 Whole mount imaging allows for quantification of total depot innervation

282 Axillary scWAT depots taken from male C57BL/6J mice, housed at room temperature or  
283 underwent cold exposure at 5°C for 7-days, were processed for whole mount imaging using the  
284 pan-neuronal marker PGP9.5 (Fig. 3a). The neurite densities per tile were then averaged for the  
285 entire area of the tissue for comparison among treatments. Quantification of images allowed for  
286 statistical analysis between experimental groups (Fig. 3b). This quantification approach is not  
287 limited to innervation assessments but can be applied to vasculature (ie: IB4) as well. Neurite



288 density per z-max tile was then portrayed as a heatmap for both inguinal and axillary scWAT  
289 depots to better visualize region specific differences in neurite densities (Fig. 3c).

290

### 291 Characterization of Peripheral Nerves in scWAT

292 Inguinal scWAT depot was co-stained with two different pan-neuronal markers (PGP9.5 and  
293  $\beta$ 3-tubulin), counterstained with DAPI to emphasize tissue cellular structure, and tiled images  
294 were z-max projected. Whole tissue imaging exhibited near-uniform staining of the largest nerve  
295 bundles by both pan-neuronal markers (Fig. 4a). Nerves are unevenly distributed throughout the  
296 tissue with the highest concentration of large nerve bundles present in the centermost third of  
297 the tissue surrounding the subiliac lymph node (SiLN) as reported previously [15]. Our imaging  
298 and analysis technique exceeds current methods because it takes the heterogenous nerve  
299 distribution into account by quantifying the entire tissue, not just representative sections. At  
300 greater magnification, z-max projection images showed an extensive network of neurons  
301 varying in diameter running throughout the tissue and surrounding adipocytes as well as  
302 vasculature (Fig. 4b) which averaged a combined neurite length of 25m per i-scWAT depot [15].

303 Again, there appears to be almost complete fluorescent overlap for each pan-neuronal  
304 marker, with slightly stronger staining of PGP9.5 on the smaller nerve fibers. Digital cross  
305 section imaging of large nerve bundles presented uniform staining throughout the bundles (Fig.  
306 4c). DAPI stained nuclei can be seen both surrounding the nerve bundle and residing within it,  
307 in between the numerous nerve fibers. Since the nuclei of the neurons are located in the ganglia  
308 the presence of nuclei within the nerve bundle suggests the presence of supporting cells (e.g.  
309 Schwann cells) or potentially perineural adipocytes residing within the bundles. This technique  
310 was also used to visualize a nerve branching (Suppl. Fig. S2c). Variation in  
311 immunofluorescence staining between the two pan-neuronal markers can be attributed in part to  
312 variations in the labeling methods of each antibody.  $\beta$ 3-tubulin was directly conjugated to a  
313 fluorophore while PGP9.5 required use of secondary fluorescent antibodies. The innate  
314 autofluorescent quality of adipose tissue, though greatly reduced by Typogen Black or  
315 TrueBlack® staining, is still visible and at its strongest when imaged at 488nm.

316 Transmission electron microscopy of scWAT sections revealed that nerves not only traverse  
317 through the tissue but may also come in direct contact with the adipocytes (Suppl. Fig. S3a-b).  
318 However, we have yet to confirm synapsing directly onto adipocytes, though potential synapses  
319 have been observed in the stromal vascular fraction (SVF) of perigonadal adipose tissue (Suppl.  
320 Fig. S4a) as well as on blood vessels (Suppl. Fig. S4b), and on myeloid lineage SVF cells in  
321 inguinal scWAT (Suppl. Fig. S4c) using the post-synaptic marker PSD95. In general, the

322 understanding of adipose tissue innervation has not extended to characterizing cellular  
323 interactions and whether they are synaptic or simply result from diffusion of neuropeptides and  
324 neurotransmitters from nearby free nerve endings.

325 To further characterize the nerves within scWAT, numerous immunostaining experiments  
326 were conducted by co-staining  $\beta$ 3-tubulin with markers for either sympathetic nerves, sensory  
327 nerves, or myelination using the markers tyrosine hydroxylase (TH), advillin (AVIL), and myelin  
328 protein zero (MPZ) respectively. Whole depot imaging demonstrated fluorescence overlap of  
329  $\beta$ 3-tubulin and TH in the largest nerve bundles with extensive TH+ axons that spanned  
330 throughout the tissue (Fig. 5a). Nerve bundle digital cross sectioning showed that only about  
331 half of the axons in a given nerve bundle are TH+ (Fig. 5b). The small individual axons  
332 branching through the tissue, however, are nearly all TH+ (Fig. 5c), consistent with previous  
333 reports [11, 21]. Fluorescent imaging of inguinal scWAT from a sympathetic nerve reporter  
334 mouse (*TH-Cre-Rosa26-GFP*) had similar findings (Suppl. Fig. S5a).

335 Digital cross sectioning of AVIL+ nerve bundles revealed similar findings to cross sectioning  
336 TH+ bundles, with only about half of the axons within the bundle presenting as AVIL+ (Fig. 5d)  
337 further suggesting the presence of mixed nerves in adipose. It is worth noting that the AVIL  
338 antibody used here was observed to mark structural proteins in some large blood vessels as  
339 well which accounted for the presence AVIL+ regions that were  $\beta$ 3-tubulin- when viewed as a  
340 tiled image. At greater magnification these large blood vessels did not interfere with imaging and  
341 the lack of AVIL+ nerve fibers became apparent. Due to this, AVIL would appear to be a less-  
342 than-ideal marker for quantifying sensory innervation in conditions that may also alter  
343 vascularity. It is thought at this time that an AVIL reporter or a  $Na_v$  1.8 reporter would be a far  
344 superior method of labeling sensory axons and a more comprehensive assessment remains to  
345 be completed.

346 *Na<sub>v</sub> 1.8-Cre x tdTomato* reporter mice were also used to investigate the presence of sensory  
347 innervation in scWAT.  $Na_v$  1.8 marks sodium channels specific to sensory nerves [31] and  
348 fluorescence imaging showed a number of  $Na_v$  1.8+ sensory nerves throughout the tissue  
349 (Suppl. Fig. S5b), both large bundles and smaller parenchymal fibers, which compliments  
350 current literature that suggests sensory innervation plays a significant role in WAT metabolic  
351 function [14, 46]. As observed with AVIL immunostaining, imaging of i-scWAT from *Na<sub>v</sub> 1.8-Cre*  
352 *x tdTomato* reporter mice also suggests the presence of mixed nerve bundles in this adipose  
353 depot (Suppl. Fig. S5b).

354 Whole depot staining with  $\beta$ 3-tubulin and MPZ revealed that all of the large nerve bundles in  
355 scWAT are myelinated (Fig. 5e). In concordance with immunostaining, Luxol fast blue (myelin

356 stain) staining of whole inguinal scWAT depots was performed which showed that the most  
357 highly myelinated nerves traverse through or nearby the SiLN (Suppl. Fig. S5c). Digital cross  
358 sectioning of MPZ+ nerve bundles showed that all of the axons within the bundle are  
359 myelinated, with the greatest fluorescence intensity being on the exterior of the bundle (Fig. 5f),  
360 indicating that myelinated and non-myelinated axons are segregated in the bundle. Z-max  
361 projection imaging of parenchymal nerve fibers revealed that the majority of nerve endings are  
362 unmyelinated (Fig. 5g). TEM imaging was used to show both myelinated and unmyelinated  
363 neurites in contact with adipocytes (Suppl. Fig. S3a-b)

364 Our whole mount imaging technique has validated the presence of mixed bundle nerves  
365 residing in WAT shown previously [16] and allowed for further investigation by creating digital  
366 cross sections of these mixed bundles. High magnification z-max projections revealed that  
367 almost the entirety of neurons within the scWAT parenchyma are TH+. Only a small percentage  
368 of axons in the tissue are myelinated, however the contribution of myelinated versus  
369 unmyelinated axons to tissue function is currently unknown.

370

#### 371 Neurovascular interaction in scWAT

372 The autonomic nervous system, comprised of sympathetic, parasympathetic, and  
373 sensory nerves, is required for regulating vascular tension [47] throughout the body, and WAT is  
374 no different. Sympathetic nerve fibers are responsible for vasoconstriction and parasympathetic  
375 fibers are responsible for vasodilation though it has been shown that WAT lacks  
376 parasympathetic innervation indicating that precise control of vasodilation is not required for  
377 WAT [11].

378 Neurovascular staining of whole depot scWAT was performed by co-staining with a pan-  
379 neuronal markers and IB4, a marker for vasculature, as it binds to erythrocytes and endothelial  
380 cells [48-52] and effectively marks vessels smaller than 200um in diameter. Wholemout axillary  
381 scWAT (a-scWAT) tiled z-max projections exposed a dense vascular network residing in the a-  
382 scWAT depot (Fig. 6a). In general, the highest concentration of large nerve bundles and large  
383 blood vessels are located within close proximity of one another. These observations are  
384 consistent with what we have observed in inguinal scWAT [15]. In contrast to neurites,  
385 capillaries appear homogenously expressed throughout the tissue (Fig. 6a). Close inspection of  
386 the neurovascular interactions within scWAT revealed three specific and reoccurring types of  
387 interactions (Fig. 6b): i) Large nerve bundles and blood vessels that run parallel to each other  
388 within the tissue but do not seem to interact otherwise, ii) Large nerve bundles that have a  
389 vascular supply providing nutrients; vasa nervorum, iii) Blood vessels that are highly innervated

390 by smaller nerves which regulate vasoconstriction; perivascular sympathetic plexus. TEM  
391 imaging revealed a small axon in the stromal vascular fraction in between adipocytes in close  
392 proximity to a capillary (Suppl. Fig. S3c). Sympathetic innervation of scWAT blood vessels was  
393 analyzed by co-staining  $\beta$ 3-tubulin with TH and IB4. Small TH+ nerve fibers were found lining  
394 many of the vessels (Fig. 6c). Although small capillaries had significantly less innervation  
395 compared to larger arterioles, some TH+ nerves were found running along them. This supports  
396 the current literature that capillaries are relatively lacking in sympathetic innervation [53-55].

397 Not all nerves within the tissue are lining blood vessels; many can be found branching  
398 the gaps from one blood vessel to another or disassociated from the blood vessels entirely. The  
399 vasa nervorum, or the blood vessels supplying nutrients to the nerve bundle, were digitally cross  
400 sectioned to show a blood vessel branching around a nerve bundle which contained 2  
401 sympathetic axons (Fig. 6d). Extensive innervation of arterioles could be found surrounding both  
402 large and small diameter vessels (Fig. 6e). Of the nerves running throughout scWAT, the  
403 majority MPZ+ nerves were found running along blood vessels as indicated by co-staining with  
404  $\beta$ 3-tubulin, MPZ, S100 $\beta$  (a Schwann cell marker), and IB4 (Fig. 6f) (Suppl. Fig. S3). Only one or  
405 two of the largest nerves lining each vessel tended to be myelinated. The smallest sympathetic  
406 projections that often engulfed many of the arterioles, when present, were found to be  
407 unmyelinated.

408 It is important to note several caveats with IB4 staining of vasculature. Mouse blood  
409 vessel diameter ranges from 250 $\mu$ m to 4 $\mu$ m dependent on type of vessel. Veins encompass the  
410 upper limit, while microvasculature such as capillaries encompass the lower limit [56]. Large  
411 diameter blood vessels (>100 $\mu$ m) often lose their erythrocytes during tissue preparation which  
412 employs a heparin wash step to remove as much blood as possible to reduce the inherent  
413 autofluorescence associated with blood cells. However, erythrocytes tend to remain in the  
414 microvasculature even after these washes. Because of this, the microvasculature is doubly  
415 stained (erythrocytes and endothelium) whereas arteries and veins present only with stained  
416 endothelium. This reduction in fluorescence, most prominent in the largest vasculature, can  
417 even be seen starting as small as 50 $\mu$ m in diameter though these vessels are still readily visible  
418 (figure 6). Also, large sensory nerve bundles, immunostained for AVIL, an actin binding protein  
419 expressed specifically in somatosensory neurons [29, 30], tended to be co-stained with IB4. IB4  
420 binding sensory neurons has been reported in the literature [57, 58] and observed in  
421 supplemental figure S5d. However, due to tissue morphology, positively stained nerve bundles  
422 can be easily distinguished from the vasculature.

423

## 424 Second Generation Harmonic Imaging

425 We also attempted to visualize the changes to inguinal scWAT innervation of morbidly  
426 obese mice which we have demonstrated to have adipose neuropathy (BTBR<sup>ob/ob</sup>); [15]. This  
427 proved technically difficult to accomplish using epifluorescent or standard confocal microscopy,  
428 due in part to the fibrotic nature of obese adipose tissue. However, with second generation  
429 harmonic label-free imaging using 2-photon microscopy, it was possible to visualize nerves and  
430 collagen within scWAT of BTBR<sup>ob/ob</sup> animals (Fig. 7). While collagen is abundant in both BTBR<sup>+/+</sup>  
431 and BTBR<sup>ob/ob</sup> animals, a greater degree of colocalization between collagen fibers and nerves is  
432 visible in BTBR<sup>ob/ob</sup> animals (Fig. 7a), likely contributing to our inability to image the adipose  
433 nerves successfully in this mouse model.

434

## 435 **Conclusion**

436 Taken together, the imaging techniques and data collected here reveal a rich and  
437 diverse neural innervation in mouse inguinal scWAT, likely indicating physiological roles that are  
438 yet to be uncovered. For example, differences in myelinated vs unmyelinated axons,  
439 heterogeneity of TH+ nerves, and the contribution of sensory nerves in adipose are yet to be  
440 clarified. In addition, the localization of true synapses or tissue junctions, versus release of  
441 nerve products from free nerve endings, and whether these exist on adipocytes or SVF cells,  
442 will also be important to uncover. The availability of new techniques allowing nerve visualization  
443 under various physiological and pathophysiological conditions will help the field advance an  
444 understanding of adipose innervation and brain-adipose communication, including  
445 neurovascular and neuroimmune contributions.

446 We have recently demonstrated diminished innervation of adipose tissue under  
447 circumstances of obesity, diabetes, and ageing, a condition we have called 'adipose  
448 neuropathy' [15]. 'Neuropathy' of adipose tissue (ie: a reduction in neurite density that may  
449 represent pathological nerve die-back) could have effects beyond the removal of sympathetic  
450 nerves releasing norepinephrine. Given that other nerve products, including from adipose tissue  
451 sensory nerves (ex: Substance P, VIP, CGRP, etc.) are found in adipose depots, the loss of  
452 proper innervation could also impact the physiological contributions of these neuromodulatory  
453 substances in adipose. Whether or not adipose sensory nerves directly communicate fuel status  
454 to the brain, perhaps in complement to endocrine factors such as leptin, is still an open  
455 question. In addition, how adipose nerves interact with vasculature versus parenchymal cells,  
456 including stromovascular cells, is also unexplored. Incoming sympathetic nerves may release

457 norepinephrine in order to affect vasoconstriction, and also to impact local adipocytes and  
458 immune cells via synaptic and non-synaptic connections.

459

460

461

462

463

464

465

466

### 467 **Acknowledgements**

468 Dr. Benjamin Harrison of UNE for developing earlier iterations of whole depot innervation  
469 quantification method. Dr. Clarissa Henry of UMaine for Leica lightsheet confocal microscope  
470 training. Morganne Robinson, Thomas Szewczyk, Cory Johnson and James Miller for technical  
471 assistance. Dr. Ian Meng of The University of New England for gifting *Nav1.8* reporter mice  
472 adipose tissues. Dr. Dustin Updike of MDI Biological Laboratory for assistance with pilot imaging  
473 studies. Dr. Seth Tyler and Kelly Edwards of UMaine for TEM technical assistance.

474

### 475 **Author Contributions**

476 JWW wrote the manuscript, created and optimized protocols, designed experiments, and  
477 conducted majority of microscopy studies. MB wrote the manuscript, designed experiments, and  
478 optimized protocols. EG conducted TEM experiments. AL and AD conducted clearing  
479 experiments. SB and AK developed neurite density quantification methods. PB and KT  
480 conducted 2-photon imaging. KLT wrote the manuscript, designed experiments, and oversaw  
481 the project.

482

### 483 **Competing Interests**

484 The authors declare no competing interests.

485

### 486 **Data and Code Availability**

487 Neurite density quantification and heat map generating code can be found on GitHub at  
488 [https://github.com/ktownsendlab/willows\\_et\\_al-2019](https://github.com/ktownsendlab/willows_et_al-2019). Protocols used for this publication can be  
489 found on Protocols.io at [dx.doi.org/10.17504/protocols.io.6nzhdf6](https://doi.org/10.17504/protocols.io.6nzhdf6). All other data is included in  
490 this manuscript.

491

### 492 **Ethical Approval**

493 All procedures and handling of animals were performed in accordance with the University of  
494 Maine's Institutional Animal Care and Use Committee (IACUC), to comply with the guidelines of  
495 the PHS Policy on Humane Care and Use of Laboratory Animals, and Guide for the Care and  
496 Use of Laboratory Animals. This study was approved by the University of Maine's IACUC, under  
497 protocol A2017-09-04.

498

499

500 **Figure Legends:**

501

502 **Figure 1: Wholemout tissue staining, imaging, and post-processing.** Diagram depicting  
503 steps of wholemount tissue processing technique (a). 1.) An intact scWAT depot is carefully  
504 excised from mouse postmortem. 2) Tissue fixed in 2% PFA at 4°C for 16hr per 1.0g of adipose.  
505 Tissue is then washed in 1X PBS (w/ Heparin 10u/mL) for four 1hr washes at 4°C on rotator 3.)  
506 Tissue is squished between large slides held together with binder clips for 1.5hr at 4°C. 4)  
507 Tissue is removed from slides and incubated in blocking solution (2.5% BSA, 1% Triton X-100,  
508 in 1X PBS) on rotator at 4°C for 1-7days with blocking solution replaced daily. 5) Tissue is  
509 washed 1hr in 1X PBS (w/ Heparin 10u/mL) and incubated in 0.1% Typogen Black in 70% EtOH  
510 for 20min, washed in 1X PBS (w/ Heparin 10u/mL) in 1hr increments at 4°C on shaker until  
511 Typogen Black run-off ceases. 6) Tissue is incubated in primary antibody solution at 4°C on  
512 rotator for 2 days. 7) Tissue is washed x4 again with 1x PBS and incubated in secondary  
513 antibody solution at 4°C on rotator overnight. 8) Tissue washed x4 with 1X PBS and mounted  
514 on slide with glycerol based mounting fluid. Glass coverslip is applied and slide is placed under  
515 significant weight for 3 days at room temp. 9.) Slide is sealed with nail polish and ready for  
516 imaging (a). Tiled z-stacks were imaged for the entire tissue with either a 5x or 10x objective  
517 and a 2D maximum projection image was rendered (b). Post processing of single tile z-max  
518 projections for neurite density quantification (c). Each z-max projection tile was further  
519 processed by subtracting the background away and adding light smoothing. Next a thresholded  
520 mask was applied and the image was skeletonized. Total neurite length was calculated for each  
521 tile and averaged for the entire viewing area (c.) Link to whole mount protocols and script for  
522 quantification (d.)

523

524

525

526

527

528



529  
530  
531  
532  
533  
534  
535  
536  
537  
538  
539  
540  
541  
542  
543  
544  
  
545  
546  
547  
548  
549  
550  
551  
552  
553  
554  
555  
556  
557  
558  
559  
560  
561

**Figure 2: Reduction tissue autofluorescence and depth coding.** Z-depth reduction was performed on inguinal scWAT depot for comparison before and after (a). Subcutaneous WAT depots from *C57BL/6J* mice were whole depot processed and incubated in either Typogen Black or TrueBlack® for equal duration. Autofluorescence was evaluated for each blocking method for 4 different fluorescent filter cubes: DAPI, GFP/FITC, Cy3/TRITC, and Cy5 (b). Blocking methods were further compared for the Cy5 filter by staining the tissues with IB4 conjugated to a 647nm fluorophore. with either 10x objective (b) or both 4x and 40x objectives (c). scWAT depot stained with PGP9.5 (green) demonstrated significant reduction in orange vascular autofluorescence when tissues were washed with 1XPBS/10U/ml Heparin imaged at 10x and 4x (d). i-scWAT depot stained with  $\beta$ 3-Tubulin, Tyrosine Hydroxylase (TH), and Isolectin IB<sub>4</sub> (IB4) and depth coded (e-f). Whole mount i-scWAT 3D depth coding was imaged with 10x objective (e) and high magnification representative 3D section was imaged with 63x objective(f). Images were captured on either Nikon E400 microscope (b-d) or Leica TCS SP8 DLS microscope (e-f).

562

563 **Figure 3: Whole depot neurite quantification.** Female *C57BL/6J* mice, aged 14-16wks, were  
564 either cold exposed (5°C) (n=6) or at room temperature (n=4) for 7 days. Axillary scWAT depots  
565 were wholemount processed and stained with PGP9.5 and imaged with Leica TCS SP8 DLS  
566 confocal laser scanning microscope with 10x objective (a). Images were z-max projected and  
567 tiled (a). Neurite density quantification was performed across cohort for comparison and  
568 analyzed using a two-tailed Student's t-test (b). Alpha level 0.05, error bars are SEMs, p = 0.414  
569 (b). Neurite density per z-max tile was calculated and used to generate a heatmap for inguinal  
570 scWAT and axillary scWAT depots (c).

571

572

573

574

575

576

577

578

579

580

581

582

583

584

585

586

587

588

589

590

591

592

593

594

595  
596  
597  
598  
599  
600  
601  
602  
603  
604  
605  
606  
607  
608  
609  
610  
611  
612  
613  
614  
615  
616  
617  
618  
619  
620  
621  
622  
623  
624  
625  
626  
627  
628

**Figure 4: Peripheral innervation of inguinal scWAT.** Inguinal subcutaneous depots from *C57BL/6J* mice were wholemount processed and stained with DAPI to show tissue morphology and the pan-neuronal markers  $\beta$ 3-Tubulin (green) and PGP9.5 (red) captured on Leica SP8 DLS microscope (a-c). Whole i-scWAT depot tiled z-max projections captured using 5x objective (a) with digital zoom-ins (i-ii). Representative images of small fiber innervation imaged as z-max projections with 63x objective (b). Nerve bundle imaged with 63x objective and digital cross sectioning performed with a 2.54x digital zoom (c).

629  
630  
631  
632  
633  
634  
635  
636  
637  
638  
639  
640  
641  
642  
643  
644  
645  
646  
647  
648  
649  
650  
651  
652  
653  
654  
655  
656  
657  
658  
659  
660  
661  
662

**Figure 5: Characterization of whole mount inguinal scWAT nerves.** scWAT depots from *C57BL/6J* mice were wholemout processed and stained with  $\beta$ 3-Tubulin (green) and either TH (red) (a-c), AVIL (red) (d), or MPZ (red) (e-g). Whole mount tiled z-max projections of i-scWAT (a,d) and a-scWAT (g) imaged with 10x objective. Nerve bundle cross sections imaged with 63x objective with a 2.54x digital zoom applied to the digital cross section rendering (b,e). Representative images of small fiber innervation imaged as z-max projections with 63x objective (c,f). All images captured on Leica TCS SP8 DLS microscope (a-g).

663  
664  
665  
666  
667  
668  
669  
670  
671  
672  
673  
674  
675  
676  
677  
678  
679  
680  
681  
682  
683  
684  
685  
686  
687  
688  
689  
690  
691  
692  
693  
694  
695  
696

**Figure 6: Neurovascular interaction within inguinal scWAT depot.** i-scWAT from *C57BL/6J* mice were wholemount processed. Whole i-scWAT depot stained with PGP9.5 (green) and IB4 (white) was captured as tiled z-max projections imaged with 10x objective on Leica TCS SP8 DLS microscope (a). PGP9.5 (green) and IB4 (red) used to display the 3 categories of neurovascular interaction within scWAT, imaged on Nikon E400 with 10x, 4x, and 40x objectives respectively (b). Representative images of innervation of blood vessels imaged as z-max projections with 63x objective.  $\beta$ 3-Tubulin (green), TH (red), IB4 (white) (b-d). Sympathetic innervation of small blood vessels (c). Vasa nervorum of i-scWAT nerve bundle imaged as z-max projection digitally cross sectioned with a 2.54x digital zoom (d). Large and small diameter blood vessel digital cross sectioning (e). 2.54x digital zoom applied to large diameter vessel cross section, 6.96x digital zoom applied to small diameter vessel cross section (e). Representative images of myelinated nerve fibers around vasculature imaged as z-max projections with 63x objective. DAPI (blue),  $\beta$ 3-Tubulin (green), MPZ (yellow), S100 $\beta$  (red), IB4 (white) (f).

697  
698  
699  
700  
701  
702  
703  
704  
705  
706  
707  
708  
709  
710  
711  
712  
713  
714  
715  
716

**Figure 7: Second harmonic generation imaging.** Two-photon microscopy was performed on immunofluorescent stained (PGP9.5) inguinal scWAT of BTBR<sup>+/+</sup> (WT) and BTBR<sup>ob/ob</sup> (MUT) animals (a). PGP9.5 was detected by excitation of AlexaFluor 488 at 800nm and emission collected using a 582 +/- 64nm filter. For detection of collagen, samples were excited at 890nm and the SHG signal was collected using a 448 +/-20nm filter. A 40x water immersion objective was used. IMARIS software was used to render 3D projections from z-stacks. Images are representative of N=3 WT/MUT, 12-week-old males.

717 **References Cited**

718

- 719 1. Blaszkiewicz, M., et al., *The Importance of Peripheral Nerves in Adipose Tissue for the*  
720 *Regulation of Energy Balance*. Biology (Basel), 2019. **8**(1).
- 721 2. Wirsén, C., *Adrenergic Innervation of Adipose Tissue Examined by Fluorescence*  
722 *Microscopy*. Nature, 1964. **202**: p. 913.
- 723 3. Cinti, S., et al., *Tim Bartness, Ph.D. (1953-2015)*. Temperature (Austin), 2016. **3**(1): p.  
724 31-8.
- 725 4. Fenzl, A. and F.W. Kiefer, *Brown adipose tissue and thermogenesis*. Horm Mol Biol Clin  
726 Investig, 2014. **19**(1): p. 25-37.
- 727 5. Bartness, T.J., C.H. Vaughan, and C.K. Song, *Sympathetic and sensory innervation of*  
728 *brown adipose tissue*. Int J Obes (Lond). 2010. **34 Suppl 1:S36-42.**: p. S36-S42.
- 729 6. Francois, M., et al., *Sympathetic innervation of the interscapular brown adipose tissue in*  
730 *mouse*. Ann N Y Acad Sci, 2019.
- 731 7. Garretson, J.T., et al., *Lipolysis sensation by white fat afferent nerves triggers brown fat*  
732 *thermogenesis*. Molecular metabolism, 2016. **5**(8): p. 626-634.
- 733 8. Foster, D.O., F. Depocas, and M. Zuker, *Heterogeneity of the sympathetic innervation of*  
734 *rat interscapular brown adipose tissue via intercostal nerves*. Can J Physiol Pharmacol,  
735 1982. **60**(6): p. 747-54.
- 736 9. Foster, M.T. and T.J. Bartness, *Sympathetic but not sensory denervation stimulates white*  
737 *adipocyte proliferation*. Am J Physiol Regul Integr Comp Physiol, 2006. **291**(6): p.  
738 R1630-7.
- 739 10. Fishman, R.B. and J. Dark, *Sensory innervation of white adipose tissue*. Am J Physiol,  
740 1987. **253**(6 Pt 2): p. R942-4.
- 741 11. Giordano, A., et al., *White adipose tissue lacks significant vagal innervation and*  
742 *immunohistochemical evidence of parasympathetic innervation*. Am J Physiol Regul  
743 Integr Comp Physiol, 2006. **291**(5): p. R1243-55.
- 744 12. Murano, I., et al., *Noradrenergic parenchymal nerve fiber branching after cold*  
745 *acclimatisation correlates with brown adipocyte density in mouse adipose organ*. J Anat,  
746 2009. **214**(1): p. 171-8.
- 747 13. Vargovic, P., et al., *Adipocytes as a new source of catecholamine production*.  
748 FEBS.Lett., 2011. **585**(14): p. 2279-2284.
- 749 14. Shi, H., et al., *Sensory or sympathetic white adipose tissue denervation differentially*  
750 *affects depot growth and cellularity*. Am J Physiol Regul Integr Comp Physiol, 2005.  
751 **288**(4): p. R1028-37.
- 752 15. Blaszkiewicz, M., et al., *Neuropathy and neural plasticity in the subcutaneous white*  
753 *adipose depot*. PLoS One, 2019. **14**(9): p. e0221766.
- 754 16. Zeng, W., et al., *Sympathetic neuro-adipose connections mediate leptin-driven lipolysis*.  
755 Cell, 2015. **163**(1): p. 84-94.
- 756 17. Cao, Y., et al., *Three-dimensional volume fluorescence-imaging of vascular plasticity in*  
757 *adipose tissues*. Mol Metab, 2018. **14**: p. 71-81.
- 758 18. Cao, Y., H. Wang, and W. Zeng, *Whole-tissue 3D imaging reveals intra-adipose*  
759 *sympathetic plasticity regulated by NGF-TrkA signal in cold-induced beiging*. Protein  
760 Cell, 2018. **9**(6): p. 527-539.

- 761 19. Chi, J., et al., *Three-Dimensional Adipose Tissue Imaging Reveals Regional Variation in*  
762 *Beige Fat Biogenesis and PRDM16-Dependent Sympathetic Neurite Density*. *Cell Metab*,  
763 2018. **27**(1): p. 226-236 e3.
- 764 20. Li, X., et al., *Co-staining Blood Vessels and Nerve Fibers in Adipose Tissue*. *J Vis Exp*,  
765 2019(144).
- 766 21. Jiang, H., et al., *Dense Intra-adipose Sympathetic Arborizations Are Essential for Cold-*  
767 *Induced Beiging of Mouse White Adipose Tissue*. *Cell Metab*, 2017. **26**(4): p. 686-692 e3.
- 768 22. Richardson, D.S. and J.W. Lichtman, *Clarifying Tissue Clearing*. *Cell*, 2015. **162**(2): p.  
769 246-257.
- 770 23. Azaripour, A., et al., *A survey of clearing techniques for 3D imaging of tissues with*  
771 *special reference to connective tissue*. *Prog Histochem Cytochem*, 2016. **51**(2): p. 9-23.
- 772 24. Seo, J., M. Choe, and S.Y. Kim, *Clearing and Labeling Techniques for Large-Scale*  
773 *Biological Tissues*. *Mol Cells*, 2016. **39**(6): p. 439-46.
- 774 25. Thompson, R.J., et al., *PGP 9.5--a new marker for vertebrate neurons and*  
775 *neuroendocrine cells*. *Brain Res*, 1983. **278**(1-2): p. 224-8.
- 776 26. Day, I.N. and R.J. Thompson, *UCHL1 (PGP 9.5): neuronal biomarker and ubiquitin*  
777 *system protein*. *Prog Neurobiol*, 2010. **90**(3): p. 327-62.
- 778 27. Draberova, E., et al., *Class III beta-tubulin is constitutively coexpressed with glial*  
779 *fibrillary acidic protein and nestin in midgestational human fetal astrocytes: implications*  
780 *for phenotypic identity*. *J Neuropathol Exp Neurol*, 2008. **67**(4): p. 341-54.
- 781 28. Latremoliere, A., et al., *Neuronal-Specific TUBB3 Is Not Required for Normal Neuronal*  
782 *Function but Is Essential for Timely Axon Regeneration*. *Cell Rep*, 2018. **24**(7): p. 1865-  
783 1879 e9.
- 784 29. Hasegawa, H., et al., *Analyzing somatosensory axon projections with the sensory neuron-*  
785 *specific Advillin gene*. *J Neurosci*, 2007. **27**(52): p. 14404-14.
- 786 30. Hunter, D.V., et al., *Advillin Is Expressed in All Adult Neural Crest-Derived Neurons*.  
787 *eNeuro*, 2018. **5**(5).
- 788 31. Bird, E.V., et al., *Correlation of Nav1.8 and Nav1.9 sodium channel expression with*  
789 *neuropathic pain in human subjects with lingual nerve neuromas*. *Mol Pain*, 2013. **9**: p.  
790 52.
- 791 32. D'Urso, D., et al., *Protein zero of peripheral nerve myelin: biosynthesis, membrane*  
792 *insertion, and evidence for homotypic interaction*. *Neuron*, 1990. **4**(3): p. 449-60.
- 793 33. Schindelin, J., et al., *Fiji: an open-source platform for biological-image analysis*. *Nat*  
794 *Methods*, 2012. **9**(7): p. 676-82.
- 795 34. Hama, H., et al., *Scale: a chemical approach for fluorescence imaging and*  
796 *reconstruction of transparent mouse brain*. *Nat Neurosci*, 2011. **14**(11): p. 1481-8.
- 797 35. Dodt, H.U., et al., *Ultramicroscopy: three-dimensional visualization of neuronal*  
798 *networks in the whole mouse brain*. *Nat Methods*, 2007. **4**(4): p. 331-6.
- 799 36. Li, L., et al., *The functional organization of cutaneous low-threshold mechanosensory*  
800 *neurons*. *Cell*, 2011. **147**(7): p. 1615-27.
- 801 37. Susaki, E.A., et al., *Advanced CUBIC protocols for whole-brain and whole-body clearing*  
802 *and imaging*. *Nat Protoc*, 2015. **10**(11): p. 1709-27.
- 803 38. Renier, N., et al., *iDISCO: a simple, rapid method to immunolabel large tissue samples*  
804 *for volume imaging*. *Cell*, 2014. **159**(4): p. 896-910.
- 805 39. Pan, C., et al., *Shrinkage-mediated imaging of entire organs and organisms using*  
806 *uDISCO*. *Nat Methods*, 2016. **13**(10): p. 859-67.



- 807 40. Chen, L., et al., *UbasM: An effective balanced optical clearing method for intact*  
808 *biomedical imaging*. Sci Rep, 2017. **7**(1): p. 12218.
- 809 41. Brantschen, S., et al., *Regulatory effect of recombinant interleukin (IL)3 and IL4 on*  
810 *cytokine gene expression of bone marrow and peripheral blood mononuclear cells*.  
811 European Journal of Immunology, 1989. **19**: p. 2017-2023.
- 812 42. Schnell, S.A., W.A. Staines, and M.W. Wessendorf, *Reduction of Lipofuscin-like*  
813 *Autofluorescence in Fluorescently Labeled Tissue*. Journal of Histochemistry &  
814 Cytochemistry, 1999. **47**(6): p. 719-730.
- 815 43. Croce, A.C. and G. Bottioli, *Autofluorescence spectroscopy and imaging: a tool for*  
816 *biomedical research and diagnosis*. Eur J Histochem, 2014. **58**(4): p. 2461.
- 817 44. Chung, K., et al., *Structural and molecular interrogation of intact biological systems*.  
818 Nature, 2013. **497**(7449): p. 332-7.
- 819 45. Kim, S.Y., et al., *Stochastic electrotransport selectively enhances the transport of highly*  
820 *electromobile molecules*. Proc Natl Acad Sci U S A, 2015. **112**(46): p. E6274-83.
- 821 46. Bartness, T.J. and M. Bamshad, *Innervation of mammalian white adipose tissue:*  
822 *implications for the regulation of total body fat*. Am J Physiol, 1998. **275**(5): p. R1399-  
823 411.
- 824 47. Sheng, Y. and L. Zhu, *The crosstalk between autonomic nervous system and blood*  
825 *vessels*. Int J Physiol Pathophysiol Pharmacol, 2018. **10**(1): p. 17-28.
- 826 48. Martinez-Santibanez, G., K.W. Cho, and C.N. Lumeng, *Imaging white adipose tissue*  
827 *with confocal microscopy*. Methods Enzymol, 2014. **537**: p. 17-30.
- 828 49. Ernst, C. and B.R. Christie, *Isolectin-IB 4 as a vascular stain for the study of adult*  
829 *neurogenesis*. J Neurosci Methods, 2006. **150**(1): p. 138-42.
- 830 50. Peters, B.P. and I.J. Goldstein, *The use of fluorescein-conjugated Bandeiraea*  
831 *simplicifolia B4-isolectin as a histochemical reagent for the detection of alpha-D-*  
832 *galactopyranosyl groups. Their occurrence in basement membranes*. Exp Cell Res, 1979.  
833 **120**(2): p. 321-34.
- 834 51. Ismail, J.A., et al., *Immunohistologic labeling of murine endothelium*. Cardiovasc Pathol,  
835 2003. **12**(2): p. 82-90.
- 836 52. Gorakshakar, A.C. and K. Ghosh, *Use of lectins in immunohematology*. Asian J Transfus  
837 Sci, 2016. **10**(1): p. 12-21.
- 838 53. Rechthand, E., et al., *Distribution of adrenergic innervation of blood vessels in*  
839 *peripheral nerve*. Brain Res, 1986. **374**(1): p. 185-9.
- 840 54. Klabunde, R.E., *Cardiovascular physiology concepts*. 2nd ed. 2012, Philadelphia, PA:  
841 Lippincott Williams & Wilkins/Wolters Kluwer. xi, 243 p.
- 842 55. Thomas, G.D., *Neural control of the circulation*. Adv Physiol Educ, 2011. **35**(1): p. 28-  
843 32.
- 844 56. Müller, B., et al., *High-resolution tomographic imaging of microvessels*. Proc SPIE,  
845 2008. **7078**: p. 70780B.
- 846 57. Fang, X., et al., *Intense isolectin-B4 binding in rat dorsal root ganglion neurons*  
847 *distinguishes C-fiber nociceptors with broad action potentials and high Nav1.9*  
848 *expression*. J Neurosci, 2006. **26**(27): p. 7281-92.
- 849 58. Vulchanova, L., et al., *Cytotoxic targeting of isolectin IB4-binding sensory neurons*.  
850 Neuroscience, 2001. **108**(1): p. 143-55.  
851

**Figure 1: Adipose tissue processing, imaging, and quantification method**

**a. Wholemount Tissue Processing for Immunostaining**

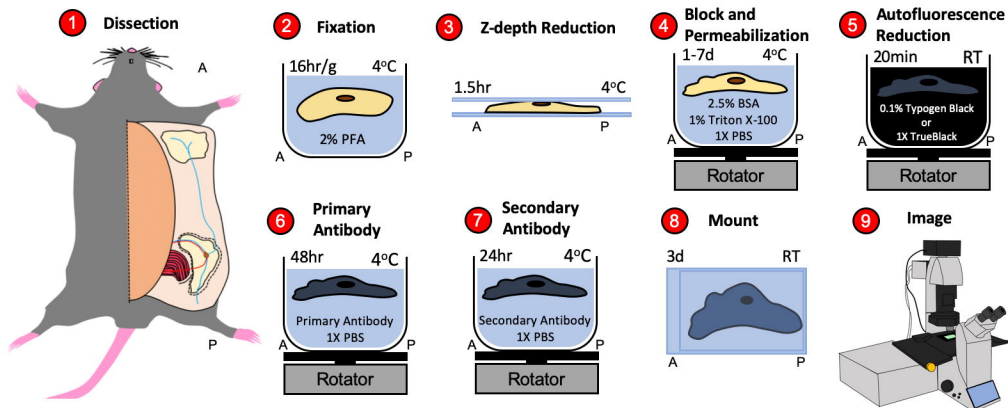

**b. Tiled Z-Stack Imaging of Wholemount Tissue**

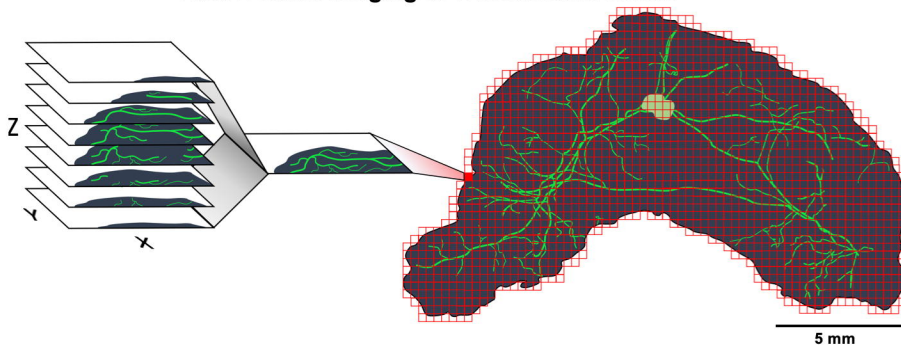

**c. Image Post-Processing for Quantification**

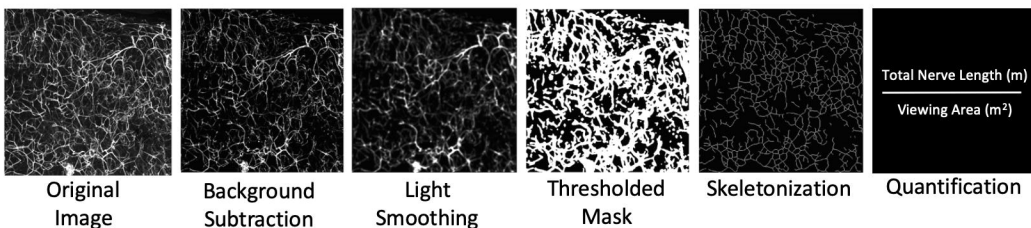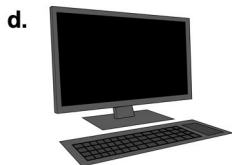

Tissue Processing and Imaging:  
[dx.doi.org/10.17504/protocols.io.6nzhdhf6](https://doi.org/10.17504/protocols.io.6nzhdhf6)  
Quantification:  
[https://github.com/ktownsendlab/willows\\_et\\_al-2019](https://github.com/ktownsendlab/willows_et_al-2019)

**Figure 2: Reduction of adipose tissue autofluorescence and depth coding**

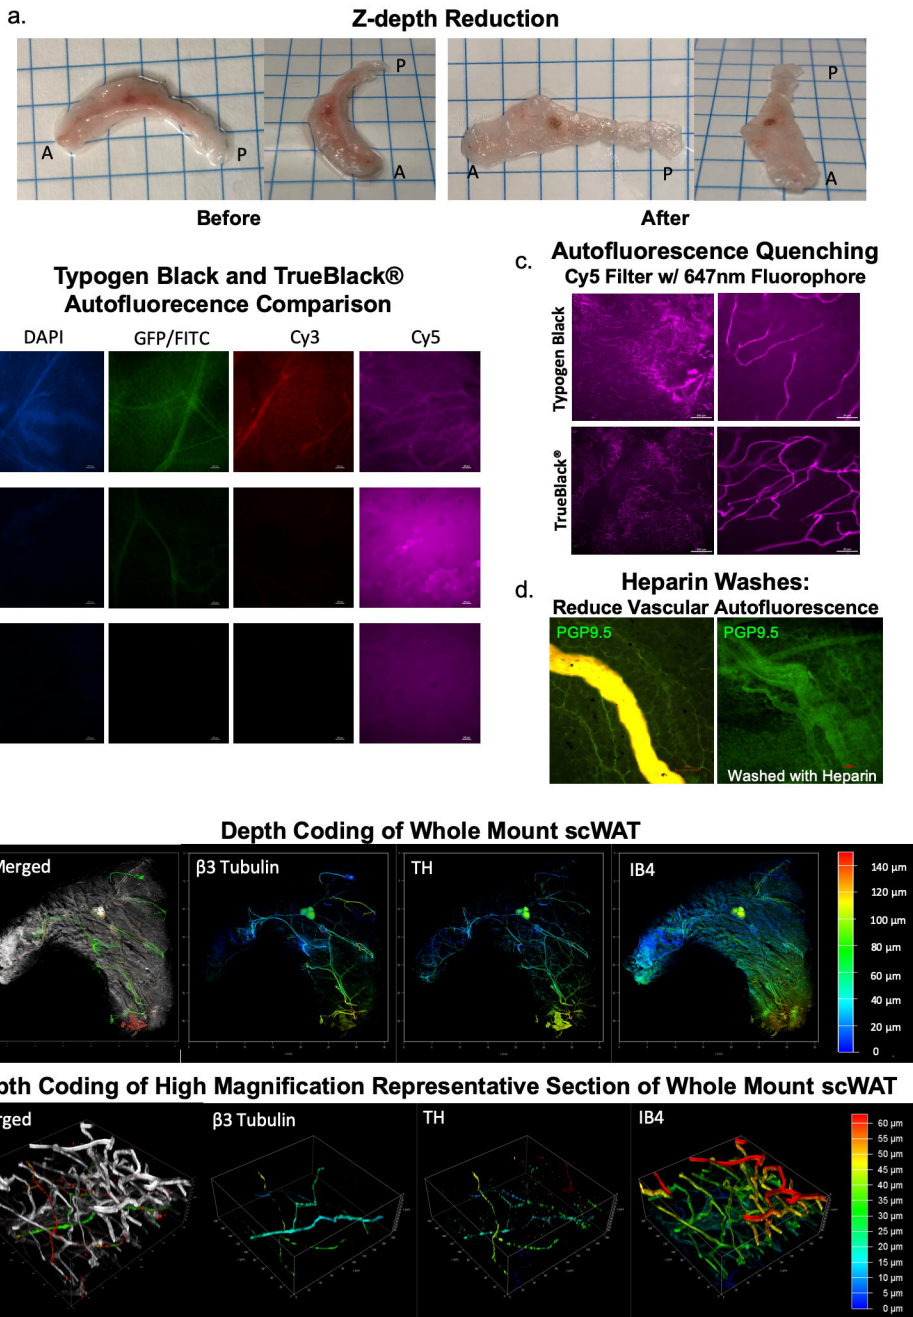

**Figure 3: Whole depot neurite quantification following cold challenge**

**a. Cold Exposed Whole Depot Axillary scWAT**

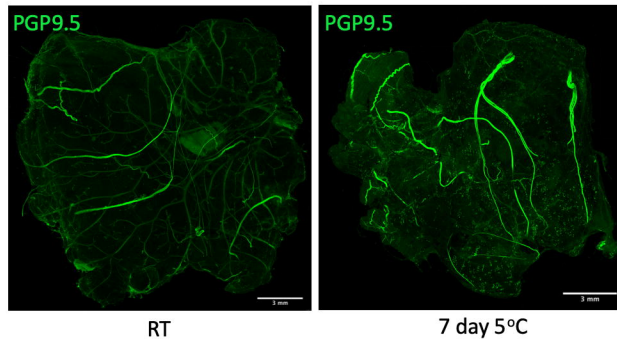

**b. Axillary scWAT Neurite Density**

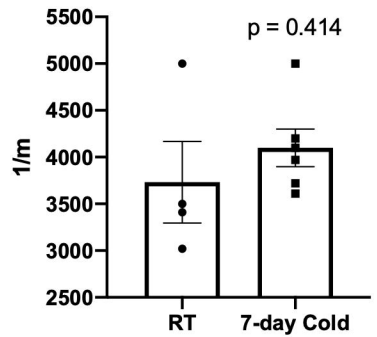

**c. Neurite Density Heatmap**

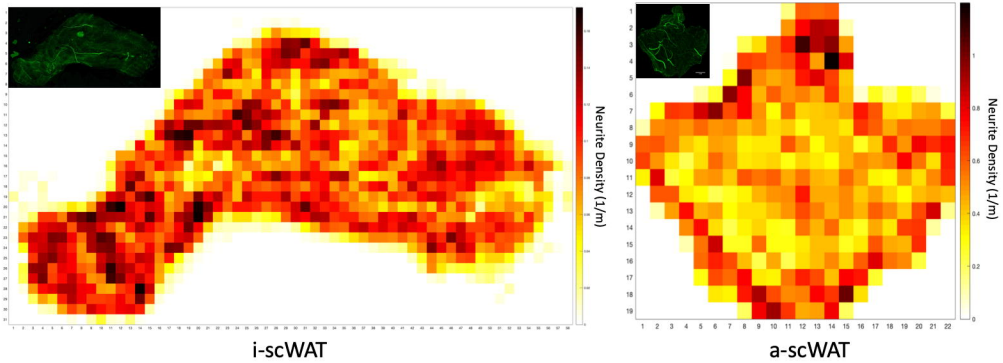

**Figure 4: Peripheral innervation of inguinal scWAT**

**a. Whole Depot Comparison of Pan-neuronal Markers in Tiled Z-stack scWAT**

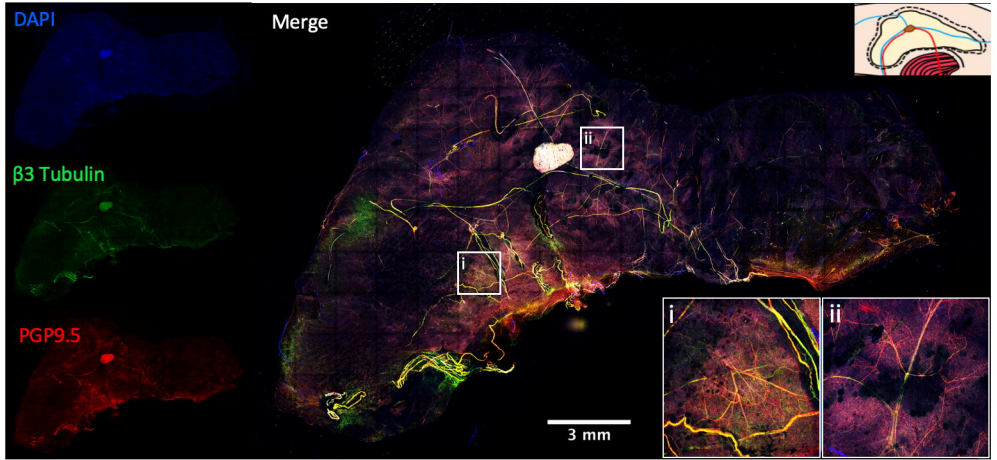

**b. Pan-neuronal Labeling of Small Nerve Fibers in scWAT**

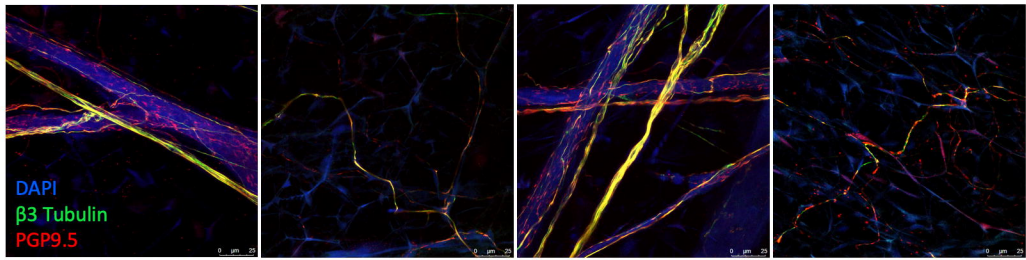

**c. Nerve Bundle Cross Section**

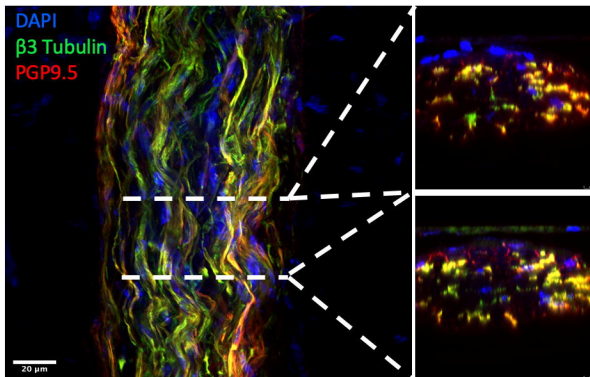

**Figure 5: Characterization of whole depot inguinal scWAT nerves**

**a. Whole Depot Sympathetic Innervation**

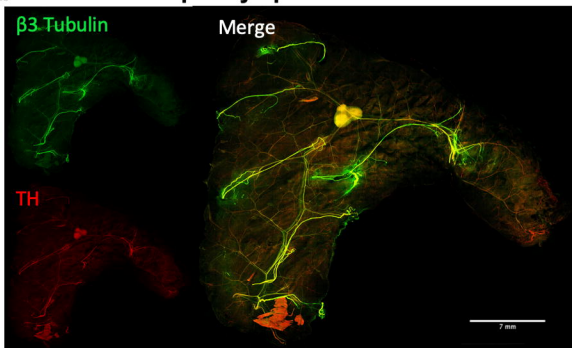

**b. TH<sup>+</sup> Nerve Bundle Cross Section**

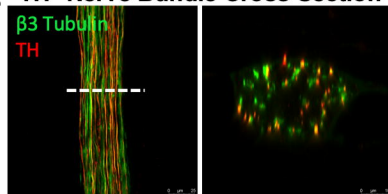

**c. Sympathetic Nerve Fibers**

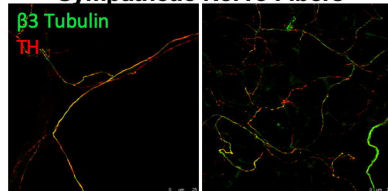

**d. AVIL<sup>+</sup> Nerve Bundle Cross Section**

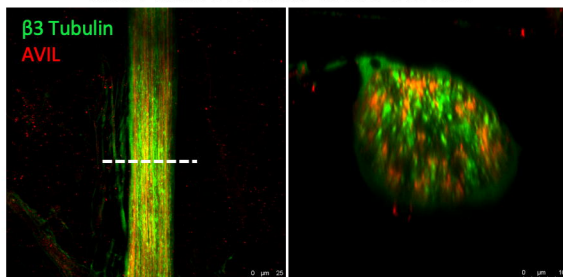

**e. Whole Depot Myelination**

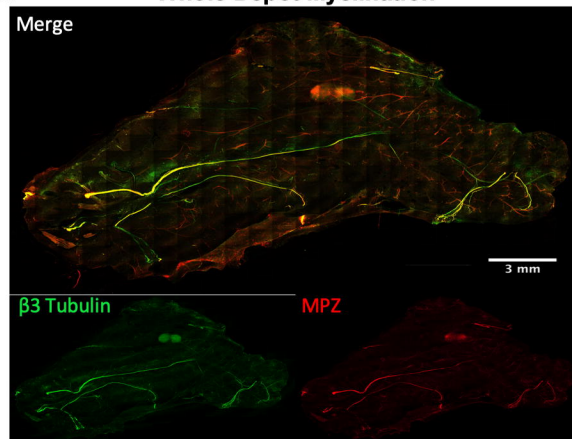

**f. MPZ<sup>+</sup> Nerve Bundle Cross Section**

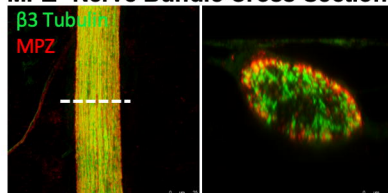

**g. Myelination of Small Fibers**

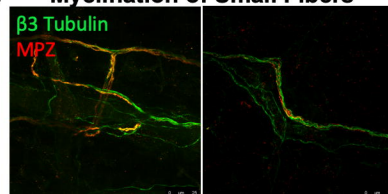

**Figure 6: Neurovascular interaction within whole mount inguinal scWAT depot**

**a. Whole Depot Neurovascular Stain**

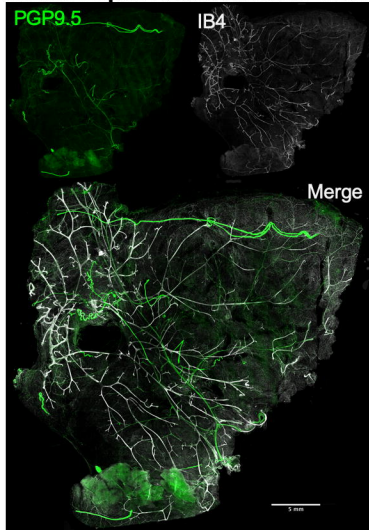

**b. Categories of Neurovascular Interactions in scWAT**

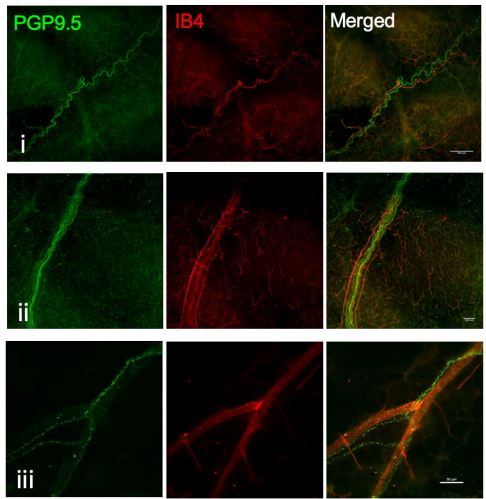

**c. SNS Innervation of scWAT Vasculature**

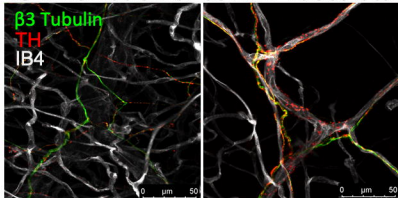

**d. scWAT Vasa Nervorum**

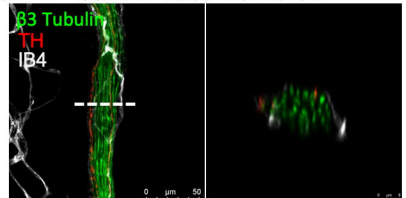

**e. scWAT Perivascular Sympathetic Plexus**

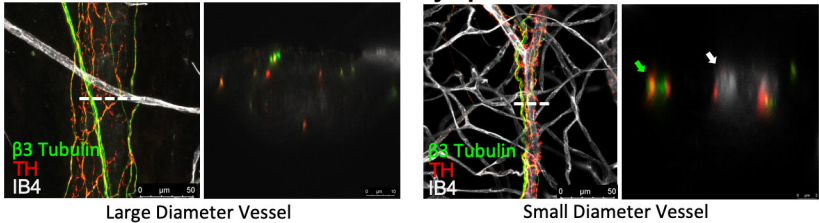

**f. Myelinated Nerve Fibers Around scWAT Vasculature**

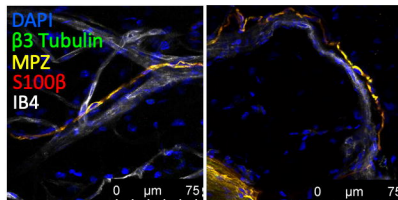

**Figure 7: Second harmonic generation imaging of collagen in BTBR<sup>+/+</sup> (WT) and BTBR<sup>ob/ob</sup> (MUT) inguinal scWAT**

**a. Second Harmonic Generation Imaging of Collagen in BTBR Inguinal scWAT**

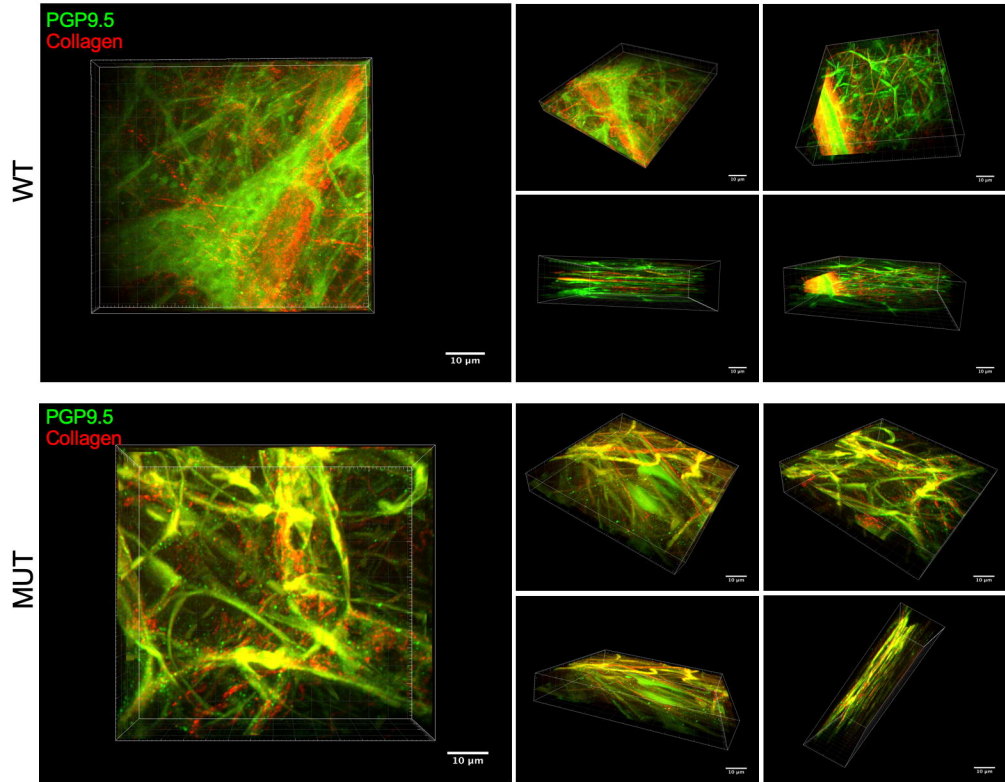

Source: https://www.biorxiv.org/content/10.1101/788885v1.full.pdf
